1 **Epstein-Barr Virus May Contribute to Central Nervous System Involvement in HIV-positive**

2 **Individuals**

3 *Lupia T<sup>1#\*</sup>, Milia MG<sup>2</sup>, Atzori C<sup>3</sup>, Audagnotto S<sup>1</sup>, Imperiale D<sup>3</sup>, Mighetto L<sup>4</sup>, Pirriatore V<sup>1</sup>, Gregori G<sup>2</sup>,*  
4 *Lipani F<sup>1</sup>, Ghisetti V<sup>2</sup>, Bonora S<sup>1</sup>, Di Perri G<sup>1</sup>, Calcagno A<sup>1</sup>.*

5 *1 Unit of Infectious Diseases, Department of Medical Sciences, University of Torino, Torino, Italy*

6 *2 Laboratory of Virology and Molecular Biology, Ospedale Amedeo di Savoia, ASL “Città di Torino”,*  
7 *Torino, Italy*

8 *3 Unit of Neurology, Ospedale Maria Vittoria, ASL “Città di Torino”, Torino, Italy*

9 *4 Laboratory of Immunology, Ospedale Maria Vittoria, ASL “Città di Torino”, Torino, Italy.*

10

11 **Running Head:** EBV and HIV in the CSF

12

13

14 #Address correspondence to Tommaso Lupia, Tommaso.lupia89@gmail.com

15 \*Present address: Tommaso Lupia, Unit of Infectious Diseases, Department of Medical Sciences,  
16 University of Torino, Amedeo di Savoia Hospital, C.so Svizzera 164, 10149 Torino, Italy

17

18

19

20 **Type of article:** Original article

21

22 **Key words:** EBV; HIV; central nervous system; blood brain barrier; trafficking; biomarkers; S-100  
23 beta.

24

25 **Word count:** Total 2097 (Abstract 250)

26

27 **Figures:** 3

28

29 **Tables:** 2

30

31

32 **Conflicts of Interest and Source of Funding:** AC has received honoraria from Abbvie, BMS, Gilead,  
33 Janssen-Cilag, MSD, Viiv and he is currently receiving research grants from BMS, Gilead and Viiv.  
34 GDP and SB have received honoraria from Abbvie, BMS, Gilead, Janssen-Cilag, MSD, Viiv. The  
35 remaining authors have no conflict of interest to declare.

36

37

38

39 **Abstract**

40 Epstein-Barr virus (EBV) often accesses the central nervous system (CNS) where it may lead to blood  
41 brain barrier (BBB) integrity disruption, facilitating the migration of immune cells into brain  
42 parenchyma. Our aim was to study the association between cerebrospinal fluid (CSF) EBV DNA and  
43 HIV-1 compartmental replication. 281 HIV-positive adults undergoing lumbar punctures for clinical  
44 reasons (excluding those with lymphoproliferative disorders) and CSF samples were examined. CSF  
45 virological, neurodamage (tau, p-tau, 1-42 beta amyloid) and immune activation (neopterin and  
46 S100beta) markers were measured by immune-enzymatic, ELISA and PCR validated methods. Two  
47 hundred eighty one patients were included; 111 (40.5 %) were naïve for antiretroviral treatment. CSF  
48 EBV DNA was detectable in 25 (21.9%) naïve and 26 (16%) treated patients at low levels (<100 and  
49 146 copies/mL). Naïve EBV+ subjects presented higher CSF HIV RNA, biomarkers (t-tau, p-tau,  
50 neopterin) and higher rates of pleocytosis. Treated EBV+ individuals showed pleocytosis, higher CSF  
51 HIV RNA, CSF to serum albumin ratio, IgG index and neopterin. No association was observed  
52 between detectable CSF EBV DNA and the rate of CSF escape. In patients with plasma HIV RNA <20  
53 copies/mL (n=97) CSF EBV DNA was detectable in 13 subjects (13.4%) and it was associated with  
54 pleocytosis, higher CSF HIV RNA and neopterin levels. EBV DNA was detectable in a considerable  
55 proportion of HIV-positive patients and it was associated with higher levels of CSF HIV RNA and  
56 neuronal damage/inflammation biomarkers. The role of EBV reactivation in HIV-associated CNS  
57 disorders warrant further studies.

58 **Importance**

59 EBV is a human gamma-herpesvirus with a seroprevalence in adults approaches 95% and the pattern of  
60 clinical manifestations is very heterogeneous and varies from asymptomatic or mild viral infection to a

61 tightly linked with several malignancies as nasopharyngeal carcinoma, Hodgkin's lymphoma and  
62 Burkitt's lymphoma. HIV-infected and immunocompetent patients were both at risk of primary  
63 infection and complications linked to EBV.

64 Primary tropism of EBV is for lymphocytes (type B, T and NK), epithelial, endothelial and smooth  
65 muscle cells and establishes lifelong latent infection. Central nervous system could be affected by this  
66 herpesvirus in primary infection and reactivation and EBV-DNA is not an uncommon finding in CSF  
67 in HIV-infected population. The significance of our research is in identifying the presence of a link  
68 between HIV and EBV CNS replication.

69

## 70 **Introduction**

71 Epstein-Barr virus (EBV) or Human Herpesvirus 4 (HHV-4) is a widely disseminated gamma  
72 herpesvirus capable to persist, lifelong and asymptotically, in a latent infection in adults [1].  
73 Transmission of EBV is so efficient that by adulthood most (> 95%) of the world's population has been  
74 infected [2].

75 EBV may affect the central nervous system (CNS) and clinical manifestations were first noted in 1931  
76 by Epstein and Johansen. Both primary infection and reactivation can cause neurological diseases and  
77 central nervous system involvement occurs in 1 to 10% of the cases [3]. Individual state of  
78 immunocompetence, age and comorbidities have been associated with the occurrence of neurological  
79 complications that include: meningo-encephalites, cerebellitis, optic neuritis, cranial nerve palsy,  
80 peripheral neuropathy, Alice in Wonderland syndrome, ataxia, chorea, post-infectious autoimmune  
81 disorders, including Guillain-Barrè syndrome, acute disseminated encephalomyelitis (ADEM) and  
82 transverse myelitis [3][4][5].

83 Biopsy proven vasculitis due to EBV infection have been reported: perivascular inflammatory infiltrate  
84 was dominantly composed of CD3+ and CD8+ T-lymphocytes and macrophages. Some of the CD3  
85 positive cells were also EBV-encoded RNA-1 (EBER1) positive, one of the two small noncoding  
86 RNAs (EBER1 & 2) found in latently EBV infected cells [6][7][8].<sup>[11]</sup>

87 In MS patients' brains, EBV infection in B cells seems to alters the ability of B cells to process and  
88 present a pathogenetically relevant myelin autoantigen and expression of higher levels of costimulatory  
89 molecules than healthy controls, suggesting an enhanced APC function of B cells in MS brains, leading  
90 to an higher autoimmune risk [9]. EBV-positive B lymphocytes count in normal human brain is very  
91 low, but is shown an higher cell number in HIV infected brains. In PCR-based studies and in situ  
92 hybridation studies were shown a detection of EBV in both lymphomatoid tissue and in pleomorphic  
93 lymphoid infiltrates [10].

94 Several works have established that EBV can infect macrovascular endothelial cells in human tissue  
95 [11] [12], human brain microvessels [13] and in culture with human umbilical vein endothelial cells  
96 (HUVECs) [14] [15]. In endothelial cells with lytic reactivation of EBV were found an increase  
97 production of pro- inflammatory molecules (CCL-2 and CCL-5) and also hyper-expression of adhesion  
98 molecules on surfaces (ICAM-1 and VCAM-1) with a potential creation of an inflammatory breach  
99 through the Blood Brain Barrier (BBB) [13] [14] [15] [16]

100 HIV-positive patients have a higher risk of EBV-associated diseases due to reduced immune  
101 surveillance; non-Hodgkin and Burkitt's lymphomas are among AIDS-defining conditions. Highly  
102 Active Antiretroviral Treatment (HAART) has dramatically reduced the incidence of HIV-associated  
103 dementia but milder forms of cognitive impairment as well as cerebrospinal fluid (CSF) HIV escaper  
104 persist despite treatment. Beside incomplete CSF antiretrovirals' penetration/effectiveness HIV escape  
105 may be due to enhanced blood brain barrier (BBB) permeability and secondary to other concomitant

106 infections (“secondary escape”) [17]. We aimed at studying the role of CSF EBV DNA in HIV-positive  
107 subjects in terms of HIV replication, BBB damage and biomarkers of neuronal damage/inflammation.

## 108 **Material and Methods**

109 Adult HIV-positive patients undergoing lumbar punctures for clinical reasons, were enrolled. Patients  
110 with primary central nervous system lymphomas (PCNSLs), lymphoproliferative diseases (Lds) and  
111 autoimmune disorders were excluded. Demographic, immunovirological, clinical and therapeutic data  
112 were recorded as well as CSF features. The protocol was approved by our Ethics Committee (Comitato  
113 Etico Interaziendale di Orbassano, n. 103/2015). Patients signed a written informed consent at  
114 enrollment.

115 HIV RNA was measured through the real time Polymerase Chain Reaction (PCR) assay CAP/CTM  
116 HIV-1 vs. 2.0 (CAP/CTM, Roche Molecular System, Branchburg, NJ, detection limit: 20 copies/mL of  
117 HIV-1 RNA). EBV DNA was measured through the real time Polymerase Chain Reaction (PCR)  
118 (detection limit: 100 copies/mL of EBV DNA).

119 Quantitative determination of albumin in serum and CSF was measured by Immunoturbidimetric  
120 methods (AU 5800, Beckman Coulter, Brea, CA, USA). CSAR, calculated as CSF albumin  
121 (mg/L)/serum albumin (g/L), was used to evaluate BBB function. BBB damage definition was derived  
122 from age-adjusted Reibergrams (normal if below 6.5 in patients aged <40 years and below 8 in patients  
123 >40 years).

124 CSF total tau (t-tau), phosphorylated tau (p-tau) and  $\beta$ -amyloid1-42 (A $\beta$ 1-42) were measured by  
125 immunoenzymatic methods (Fujirebio diagnostics, Malvern, U.S.A.) with limits<sub>[SEP]</sub> of detection  
126 respectively of 57, 20 and 225 pg/ml. Neopterin and S100B were measured through validated ELISA  
127 methods [DRG Diagnostics (Marburg, Germany) and DIAMETRA S.r.l. (Spello, Italy), respectively].

128 Reference values were as follows: t-tau [ $<300$  pg/mL (in patients aged 21–50),  $<450$  pg/mL (in patients  
129 aged 51–70) or  $<500$  pg/mL in older patients], p-tau ( $<61$  pg/mL), 1–42 beta amyloid ( $>500$  pg/mL),  
130 neopterin ( $<1.5$  ng/mL) and S100B ( $<380$  pg/mL) [18].

131 HIV RNA was measured through the real time Polymerase Chain Reaction (PCR) assay CAP/CTM  
132 HIV-1 vs. 2.0 (CAP/CTM, Roche Molecular System, Branchburg, NJ, detection limit: 20 copies/mL of  
133 HIV-1 RNA). EBV DNA was measured through the real time Polymerase Chain Reaction (PCR)  
134 (detection limit: 150 copies/mL of EBV DNA).

135 Data were analyzed using standard statistical methods: variables were described with medians  
136 [interquartile ranges (IQR) or ranges (minimum-maximum)] and they were compared using non-  
137 parametric tests (Mann–Whitney, Kruskal-Wallis and Spearman’s tests as specified in the text). Data  
138 analysis was performed using PASW software version 22.0 (IBM).

139

## 140 **Results**

141 Two hundred and eighty one adult patients were included. 111 (40.5 %) patients were naïve for  
142 combination antiretroviral treatment (cART); baseline and immune-virological characteristics,  
143 stratified by cART use, are shown in Table 1. Lumbar punctures were performed before starting  
144 antiretroviral treatment in naïve late presenting subjects ( $CD4^+$  T lymphocytes  $<100/uL$ ) or in  
145 symptomatic treated patients with cognitive disorders, headache or other neurological complaints.

146 CSF EBV DNA was detectable in 25 naïve (21.9%) and 26 treated (16%) patients with median values  
147 of  $<100$  ( $<100-234$ ) and  $146$  ( $<100-612$ ) copies/mL respectively. Virological, neuronal damage and  
148 inflammation biomarkers stratified by cART use and CSF EBV detection are shown in Table 2.

149 Naïve patients with detectable EBV DNA had higher CSF HIV viral load (4.2 vs. 3.7 log<sub>10</sub> copies/mL,  
150 p=0.010); CSF to plasma HIV RNA ratios (25 vs. 4%, p=0.025), higher rates of pleocytosis (52% vs.  
151 12.6%, p<0.001), CSF neuronal damage biomarkers t-tau (233 vs. 114 pg/mL, p=0.002), p-tau (38 vs.  
152 29 pg/mL, p=0.051) and neopterin (9.25 vs. 2.02 ng/mL, p=0.001) (Figure 1 and 2, above).

153 Treated patients with detectable EBV DNA had lower CD4 cell counts (136 vs. 287 cell/uL, p=0.015)  
154 and higher CSF HIV RNA (2.1 vs. <1.3 log<sub>10</sub> copies/mL, p<0.001), higher levels of pleocytosis (40 vs.  
155 8.3%, p<0.001), CSAR (6.1 vs. 5.1, p=0.011), IgG index (4.7 vs. 3.8, p=0.042) and neopterin (1.79 vs.  
156 0.81 ng/mL, p=0.009) (Figure 1 and 2, below). Conversely 1-42 beta amyloid was lower in EBV-  
157 positive individuals (788 vs. 893 pg/mL, p=0.007).

158 The rate of CSF escape was similar in EBV-positive naïve (8.3% vs. 4.5%, p=0.607) and treated  
159 patients (28% vs. 23.3%, p=0.615).

160 In plasma controllers (HIV RNA <20 copies/mL, n=97) CSF EBV DNA was detectable in 13  
161 individuals (13.4%): it was associated with pleocytosis (50% vs. 8.4%, p=0.001), higher CSF HIV  
162 RNA in those with detectable viral load (2.28 vs. 1.85 Log<sub>10</sub> copies/mL, p=0.011) and higher CSF  
163 neopterin levels [2.81 ng/mL vs. 0.77 ng/mL, p=0.012] (Figure 3). In CSF controllers (CSF HIV RNA  
164 <20 copies/mL, n=84) CSF EBV DNA was detectable in 10 individuals (11.9%): it was associated with  
165 pleocytosis (66.6% vs. 6.9%, p<0.001) and border-line higher CSF neopterin (3.74 vs. 0.78, p=0.06)  
166 (Figure 3).

167

## 168 **Discussion**

169 In this study EBV DNA was detectable at low concentrations in up to 21% of HIV-positive patients  
170 and it was associated with higher CSF HIV viral load and up to three-time higher rate of pleocytosis.

171 Such prevalence decreased in treated patients although in 13.4% of those with undetectable plasma  
172 viral load EBV was still detectable and associated with worse compartmental virological and  
173 immunological biomarkers.

174 Several studies reported the role of EBV in immunocompromised patients and they showed that the  
175 detection of EBV DNA in the CSF is a good marker of primary central nervous system lymphoma  
176 (PCNSL, with sensitivity and specificity of 70% and 80%) [19] [20] [21] [22]. Some studies reported  
177 the development of PCNSL in HIV-infected EBV-positive patients [23] [24] [25] [26].

178 Weinberg and coll. reported in some patients the presence of pleocytosis, detectable CSF EBV DNA  
179 and EBV related-mRNA supporting the hypothesis that EBV DNA is not carried by latently infected  
180 inflammatory cells but from actively replicating virus [27]. Furthermore EBV affects the immune  
181 system and it may enhance neuronal degeneration in chronic inflammatory conditions. [13][28]. Higher  
182 rates of B-amyloid protein and neurofibrillary tangles have been observed in the brains of EBV-  
183 positive patients diagnosed with Alzheimer's dementia as compared to controls [29]. EBV may cause a  
184 sub-clinical chronic infection and facilitate inflammatory cells' trafficking through the BBB thus  
185 increasing HIV entrance into the CNS. [30][31]. Our data seem to confirm this hypothesis since both  
186 naïve and treated patients present higher CSF HIV viral loads (and CSF to plasma HIV RNA ratios)  
187 and white blood cells. Additionally cART-treated patients with detectable CSF EBV DNA showed  
188 higher CSF to albumin ratios supporting a potential role in the persistence of BBB damage. The latter  
189 has been shown to be a prevalent feature of patients with dementia, to persist in some subjects despite  
190 treatment and to be associated with markers of neuronal damage and inflammation [32][33][34].  
191 Hosting EBV astrocytes, and microglia, theoretically could create a wide net of cell-to-cell crosstalk  
192 encouraging migration of monocytic/macrophagic line cells and modifying CNS physiological  
193 homeostasis [35][36][37]. This effect may be independent from HIV control and immune system



194 improvement: these conditions have been associated with the absence of neuronal damage and with the  
195 lowest CSF concentrations of neopterin [38][39][40].

196 In a recent study that analyzed 108 gut biopsies collected from 19 HIV-infected and 22 HIV-  
197 uninfected<sup>[SEP]</sup> participants, CMV and EBV were detected in more than 70% of samples but more  
198 commonly in HIV-positive subjects [41].<sup>[SEP]</sup> While the negative effects of sporadic or continuous CMV  
199 replication are well-known, there is still uncertainty on the role of EBV in chronic immune activation.

200 Additionally EBV may have a role in suppressing the CNS immune system and therefore maintain an  
201 incomplete T-cell mediated inflammatory response; this may be achieved through the expression of  
202 viral genes encoding for proteins with immunoevasin-like function. This may translate into higher rates  
203 of pleocytosis but with less inflammatory activity [42][43]. On the other hand our EBV-positive treated  
204 patients showed lower CD4 counts thus suggesting that immune control may be needed in order to  
205 restore a partial control on EBV low level replication.

206 Some limitations of this study should be acknowledged including the low sample size, the lack of a  
207 control group and the lack of plasma EBV DNA measurements. Additionally our cohorts include  
208 several patients with very low nadir CD4 cell counts and heterogeneous clinical conditions: the same  
209 effect may not be observed in less advanced individuals.

210 In conclusion we reported for the first time the prevalence of EBV detection in the CSF of HIV-  
211 positive patients without lympho-proliferative disorders. Besides we observed that naïve subjects with  
212 detectable CSF EBV DNA had a higher HIV viral load and higher markers of neuronal damage and  
213 inflammation; in treated individuals despite a higher HIV viral load we report a higher prevalence of  
214 blood brain barrier damage, pleocytosis and immune activation. Further studies are warranted for  
215 understanding the contribution of EBV to HIV-associated CNS disorders.

216

217

218

219

220

221

222

223 **Tables**

224 **Table 1: Baseline characteristics**

|                                               | <b>Naive</b>       | <b>Treated</b>   |
|-----------------------------------------------|--------------------|------------------|
| <b>n</b>                                      | 111                | 170              |
| <b>Age:</b> years                             | 44 (37.5-48)       | 48 (42.3-56.1)   |
| <b>Male gender:</b> n (%)                     | 78 (70.7%)         | 117 (69.1%)      |
| <b>BMI:</b> Kg/m <sup>2</sup>                 | 24.5 (19,6 – 25,1) | 22.8 (20-25.2)   |
| <b>CD4:</b> Cells/uL                          | 67 (27 – 157)      | 319 (116 – 570)  |
| <b>CD4 nadir:</b> Cells/uL                    | 64 (25 – 141)      | 46 (13 – 194)    |
| <b>plasma VL:</b> Log <sub>10</sub> copies/mL | 5.3 (4.9 - 5.9)    | 1.3 (<1.3 – 1.9) |
| <b>CSF VL:</b> Log <sub>10</sub> copies/mL    | 3.9 (2.9 - 4.7)    | 1.4 (<1.3 – 2.1) |
| <b>Time with HIV-positive test:</b> months    | 78 (47 – 205)      | 197 (95 – 290)   |
| <b>ARV classes:</b> NNRTI                     | -                  | 43               |
| PI                                            | -                  | 106              |
| INSTI                                         | -                  | 45               |
| MVC                                           | -                  | 16               |
| <b>Indication for LP:</b> Late Presentation   | 48                 | 49               |
| Opportunistic Infection                       | 24                 | 32               |
| HAND                                          | 16                 | 40               |
| Syphilis                                      | 1                  | 5                |
| Follow up                                     | 0                  | 0                |
| Headache                                      | 0                  | 2                |
| <b>CSF EBV detectable:</b> n (%)              | 25 (21.9%)         |                  |

|                                                               |                    |                               |
|---------------------------------------------------------------|--------------------|-------------------------------|
| <b>CSF EBV DNA in those with detectable levels: copies/mL</b> | <100 (< 100 – 292) | 26 (16%)<br>141 (< 100 - 448) |
|---------------------------------------------------------------|--------------------|-------------------------------|

225

226 **Table 1:** Demographic, immunovirological and clinical variables of subjects at baseline. “BMI” body  
 227 mass index, “VL” viral load, “CSF” cerebrospinal fluid, “HAART” Highly Active Antiretroviral  
 228 Treatment, “NNRTI” non-nucleoside reverse transcriptase inhibitor, “PI” protease inhibitor, “INSTI”  
 229 integrase strand-transfer inhibitor, “MVC” Maraviroc, “HAND” HIV-1 associated neurocognitive  
 230 disorder.

231

232

233 **Table 2 Cerebrospinal fluid biomarkers characteristics of the four groups**

|                         | Naive               |                     |         | Treated           |                     |         |
|-------------------------|---------------------|---------------------|---------|-------------------|---------------------|---------|
|                         | CSF EBV-            | CSF EBV+            | P value | CSF EBV-          | CSF EBV+            | P value |
| <b>CSF cells: n/uL</b>  | 0 (0-3)             | 10 (0-43)           | <0.001  | 0 (0-3)           | 0 (0-40)            | <0.001  |
| <b>CSF pleocytosis</b>  | 12.6%               | 52%                 | <0.001  | 8.6%              | 40%                 | <0.001  |
| <b>CSAR</b>             | 5.9<br>(4 – 8.7)    | 7.2<br>(4.1 – 11.2) | n.s.    | 5.1<br>(3.7-7.0)  | 6.1<br>(5.2-10.6)   | 0.008   |
| <b>BBBi</b>             | 41.2%               | 47.8%               | n.s.    | 28.3%             | 45.8%               | 0.090   |
| <b>IgG index</b>        | 0.4<br>(0.2-0.7)    | 0.5<br>(0.2-0.8)    | n.s.    | 0.4<br>(0.2-0.6)  | 0.5<br>(0.3-0.8)    | 0.020   |
| <b>t-tau: pg/mL</b>     | 114<br>(67.7-202)   | 233<br>(130-334)    | 0.001   | 130.1<br>(58-212) | 62<br>(37.5-153)    | n.s.    |
| <b>p-tau: pg/mL</b>     | 29<br>(21.6-39,2)   | 38<br>(31-44.7)     | 0.034   | 35<br>(25-41.8)   | 28.9<br>(21.5-37.5) | n.s.    |
| <b>Aβ1-42: ng/mL</b>    | 904<br>(643 – 1105) | 839<br>(584 – 1181) | n.s.    | 893<br>(748-1075) | 788<br>(636-882)    | 0.037   |
| <b>Neopterin: ng/mL</b> | 2.02                | 9.25                | <0.001  | 0.81              | 1.79                | 0.070   |

|                     |                     |                     |      |                 |                  |      |
|---------------------|---------------------|---------------------|------|-----------------|------------------|------|
|                     | (1.1 – 3.8)         | (3.3-12.1)          |      | (0.5-1.4)       | (0.6-4.3)        |      |
| <b>S100B:</b> pg/mL | 150.7<br>(87 - 242) | 188.4<br>(96 – 279) | n.s. | 140<br>(85-206) | 54<br>(37.5-210) | n.s. |

234

235 Table 2: Immunoactivation and neurodamage markers, stratified according to presence or not of EBV

236 DNA on CSF and cART. “CSF” cerebrospinal fluid, “CSAR” Cerebrospinal fluid Serum Albumin

237 Ratio, “BBBi” Blood Brain Barrier impairment, “t-tau” total tau, “p-tau”phosphorylated tau, “A $\beta$ 1-42”

238 1-42 beta amyloid, “S100B” S100 Beta. “n.s.” non significant (p values >0.05).

239

240

241

242 **Figure 1**

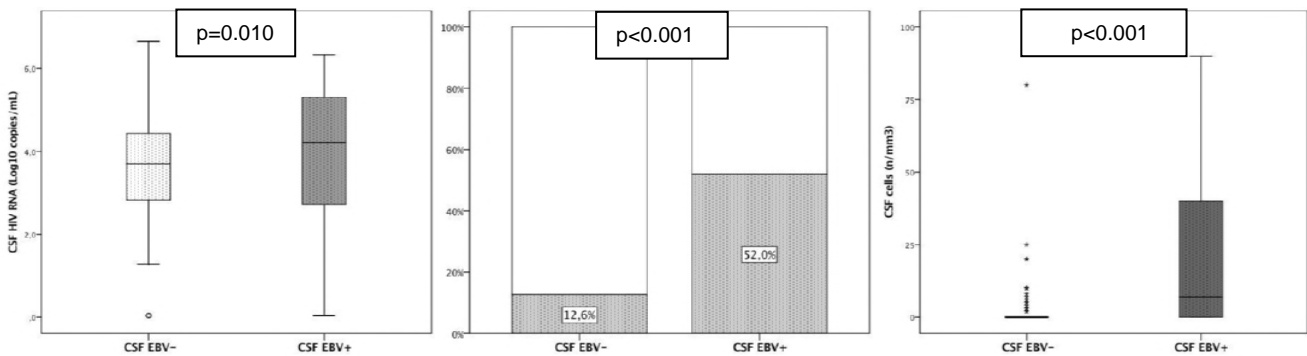

243

244

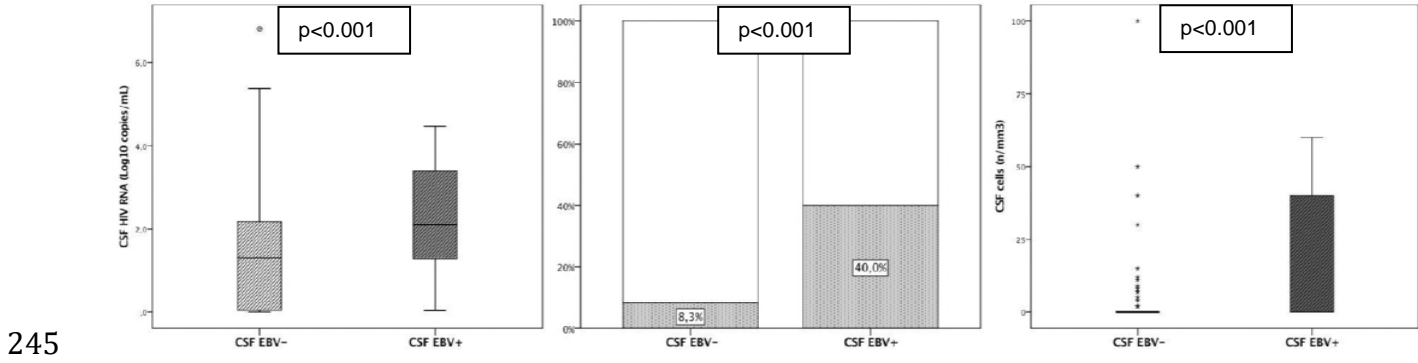

245

246 **Figure 1: Cerebrospinal fluid HIV RNA (A), pleocytosis (B) and cell numbers (C) in naïve**  
247 **(above) and treated patients (below). “CSF”, cerebrospinal fluid; “CSF EBV+”, detectable CSF EBV**  
248 **DNA.**

249

250

251

252

253 **Figure 2**

254

n.s.

p=0.001

n.s.

p=0.001

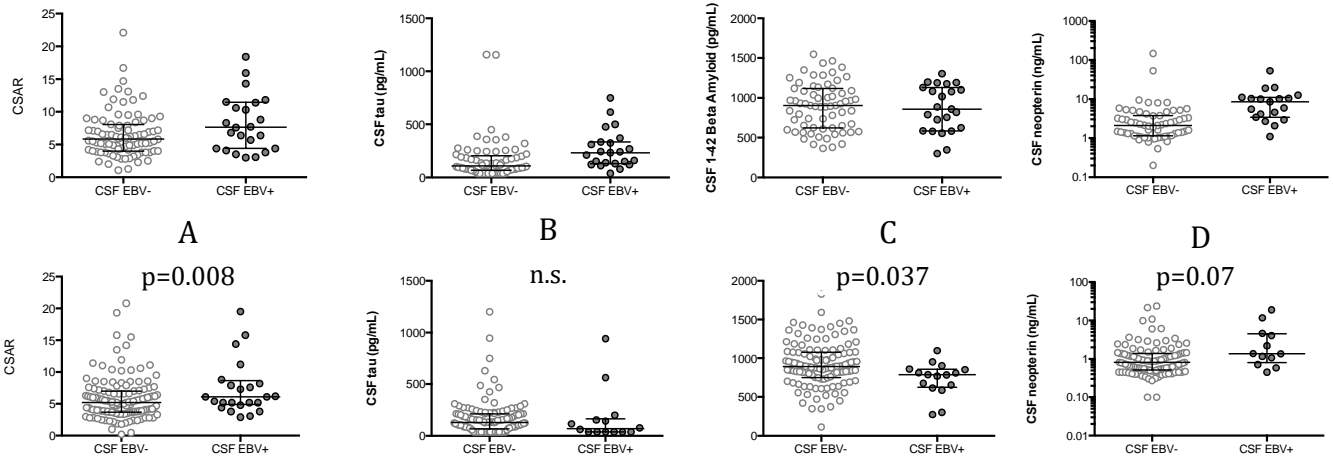

255

256

257 **Figure 2: Cerebrospinal fluid biomarkers concentrations in naïve (above) and treated patients**  
258 **(below); cerebrospinal fluid to serum albumin ratio (A), total tau (B), 1-42 beta amyloid (C) and**  
259 **neopterin (D).** “CSF”, cerebrospinal fluid; “CSF EBV+”, detectable CSF EBV DNA, “CSAR”; CSF to  
260 serum albumin ratio. All scatter dot plots present a central bar (median) with lateral error bars (IQR). In  
261 all graphs white dots represent observations in the EBV-negative group (left) instead black dots picture  
262 observations in EBV-positive group (right).

263

264

265

266

267 **Figure 3**

P=0.001

P=0.011

p=0.012

268

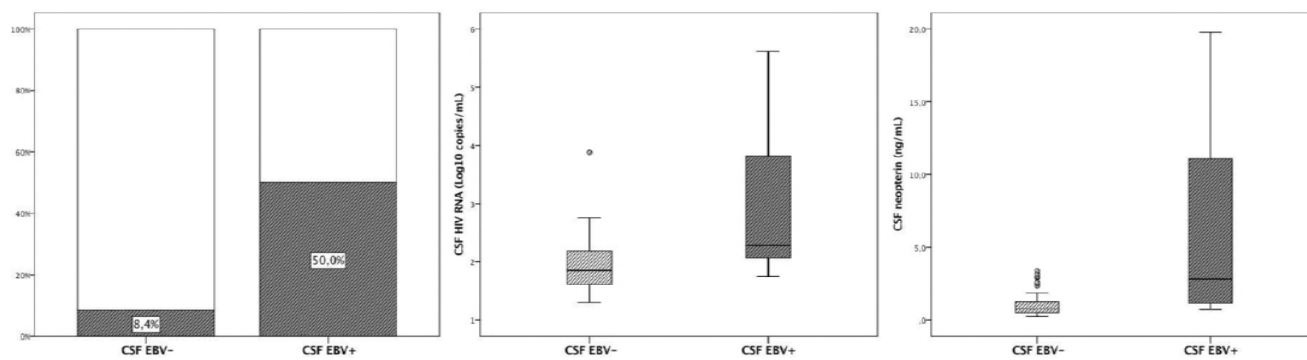

269 **Figure 3: Cerebrospinal fluid pleocytosis (A), HIV RNA (B) and neopterin (C) in patients with**  
270 **plasma HIV RNA < 20 copies/mL. “CSF”, cerebrospinal fluid; “CSF EBV+”, detectable CSF EBV**  
271 **DNA**

272

273

274

275

276

277

278

279

280

281

282 **References**

- 283  
284  
285  
286  
287  
288  
289  
290  
291  
292  
293  
294  
295  
296  
297  
298  
299  
300  
301  
302  
303  
304  
305  
306  
307  
308  
309  
310  
311  
312  
313  
314  
315  
316  
317  
318  
319  
320  
321  
322  
323  
324  
325  
326  
327  
328  
329  
330
1. Calderwood MA, Venkatesan K, Xing L, Chase MR, Vazquez A, Holthaus AM, Ewence AE, Li N, Hirozane-Kishikawa T, Hill DE, Vidal M, Kieff E, Johannsen E (2007) Epstein-Barr virus and virus human protein interaction maps. *Proc Natl Acad Sci USA* 104: 7606–7611
  2. Luzuriaga K, Sullivan L. Infectious mononucleosis. *N Engl J Med.* 2010;362:1993–2000
  3. Abul-Kasim K, Palm L, Maly P, Sundgren PC. The neuroanatomic localization of Epstein-Barr virus encephalitis may be a predictive factor for its clinical outcome: a case report and review of 100 cases in 28 reports. *J Child Neurol.* 2009;24:720-726
  4. Doja A, Bitnun A, Lee E, . Pediatric Epstein–Barr virus-associated encephalitis – 10-year review. *J Child Neurol* 2006; 21(5): 384–391
  5. Kleinschmidt-DeMasters BK, Damek DM, Lillehei KO, Dogan A, Giannini C. Epstein-Barr virus-associated primary CNS lymphomas in elderly patients on immunosuppressive medications. *J Neuropathol Exp Neurol.* 2008;67:1103–11
  6. Kobayashi Z, Tsuchiya K, Takahashi M et al. An autopsy case of chronic active Epstein–Barr virus infection (CAEBV): Distribution of central nervous system (CNS) lesions. *JNeurolSci*2008; 275:170–7
  7. Jha HC, Mehta D, Lu J, El-Naccache D, Shukla SK, Kovacsics C, Kolson D, Robertson ES. 2016. Gammaherpesvirus infection of human neuronal cells. *mBio* 6(6):e01844-15. doi:10.1128/mBio.01844-15
  8. Kano K.,Katayama T., Takeguchi S., Asanome A.,Takahashi K., Saito T.,Sawada J., Saito M., Biopsy-proven case of Epstein–Barr virus (EBV)-associated vasculitis of the central nervous system, *Neuropathology* 2017; 37,259–264
  9. Morandi E, Jagessar SA, 't Hart BA, Gran B. EBV infection empowers human B cells for autoimmunity: role of autophagy and relevance to multiple sclerosis. *J Immunol* (2017)
  10. Anthony I. C., Crawford D. H., Bell J. E. (2003). B lymphocytes in the normal brain: contrasts with HIV-associated lymphoid infiltrates and lymphomas. *Brain* 126, 1058–1067
  11. Ban, S., Y. Goto, K. Kamada, M. Takahama, H. Watanabe, T. Iwahori, and H. Takeuchi. 1999. Systemic granulomatous arteritis associated with Epstein-Barr virus infection. *Virchows Arch.* 434:249-254
  12. Guarner J., Unger E.: Association of Epstein-Barr Virus in Epithelioid Angiomatosis of AIDS Patients, *American Journal of Surgical Pathology.* 14(10):956-960, October 1990
  13. Casiraghi C, Dorovini-Zis K, Epstein-Barr virus infection of human brain microvessel endothelial cells: A novel role in multiple sclerosis, *Journal of Neuroimmunology* 2011 , Volume 230 , Issue 1 , 173 – 177
  14. Jones K., Rivera C., Sgadari C., Franklin J., Max E.E., Bhatia K., Tosato G. Infection of human endothelial cells with Epstein-Barr virus. *J. Exp. Med.* 1995;182:1213–1221
  15. Xiong A, Clarke-Katzenberg RH, Valenzuela G, Izumi KM, Millan MT. Epstein-Barr virus latent membrane protein 1 activates nuclear factor- $\kappa$ B in human endothelial cells and inhibits apoptosis. *Transplantation.* 2004;78:41–9
  16. Kanno H, Watabe D, Shimazu N et al. Adhesion of Epstein–Barr virus-positive natural killer cell lines to cultured endothelial cells stimulated with inflammatory cytokines. *Clin Exp Immunol* 2008; 151:519
  17. Ferretti F., Gisslen M., Cinque P., Price RW:Cerebrospinal Fluid HIV Escape from Antiretroviral Therapy *Curr HIV/AIDS Rep* (2015) 12:280–288
  18. Green AJ, Harvey RJ, Thompson EJ, Rossor MN (1997) Increased S100beta in the cerebrospinal fluid of patients with frontotemporal dementia. *Neurosci Lett* 235(1-2):5–8
  19. De Luca A, Antinori A, Cingolani A, et al. Evaluation of cerebrospinal fluid EBV-DNA and IL-10 as markers for in vivo diagnosis of AIDS-related primary central nervous system lymphoma. *Br J Haematol.* 1995;90:844–849



- 331 20. Cinque, P, Vago L, Dahl H, et al. Polymerase chain reaction on cerebrospinal fluid for  
332 diagnosis of virus-associated opportunistic diseases of the central nervous system in HIV-  
333 infected patients. *AIDS* 1996;10:951–958 [SEP]
- 334 21. Bossolasco S, Cinque P, Ponzoni M, et al. Epstein-Barr virus DNA load in cerebrospinal fluid  
335 and plasma of patients with AIDS-related lymphoma. *J Neurovirol* 8: 432-438, 2002 [SEP]
- 336 22. Yanagisawa K., Tanuma J., Hagiwara S. et al.: Epstein-Barr Viral Load in Cerebrospinal Fluid  
337 as a Diagnostic Marker of Central Nervous System Involvement of AIDS-related Lymphoma,  
338 *Intern Med* 52: 955-959, 2013
- 339 23. Brink NS, Sharvell Y, Howard MR, Fox JD, Harrison MJ, Miller RF. Detection of Epstein-Barr  
340 virus and Kaposi's sarcoma-associated herpesvirus DNA in CSF from persons infected with  
341 HIV who had neurological disease. *J Neurol Neurosurg Psychiatry*. 1998;65:191–5
- 342 24. Cinque P, Brytting M, Vago L, et al. Epstein-Barr virus DNA in cerebrospinal fluid from  
343 patients with AIDS-related primary lymphoma of the central nervous system. *Lancet* 342: 398-  
344 401, 1993 [SEP]
- 345 25. Rojanawiwat A, Miura T, Thaisri H, Pathipvanich P, et al. Frequent detection of Epstein-Barr  
346 virus and cytomegalovirus but not JC virus DNA in cerebrospinal fluid samples from human  
347 immunodeficiency virus-infected patients in northern Thailand. *J Clin Microbiol*. 2005
- 348 26. Wang J, Ozzard A, Nathan M, Atkins M, Nelson M, Gazzard B, Bower M 2007. The  
349 significance of Epstein-Barr virus detected in the cerebrospinal fluid of people with HIV  
350 infection. *HIV Med* 8:306–311
- 351 27. Weinberg A. , Shaobing L., Palmer M., et al: Quantitative CSF PCR in Epstein-Barr virus  
352 infection of the central nervous system. *Ann Neurol* 2002;52:543—548
- 353 28. Mrass P, Weninger W.. Immune cell migration as a means to control immune privilege: lessons  
354 from the CNS and tumors. *Immunol Rev* (2006) 213:195–212
- 355 29. Xu S., Gaskin F., Increased incidence of anti-b-amyloid autoantibodies secreted by Epstein-  
356 Barr virus transformed B cell lines from patients with Alzheimer's disease *Mechanisms of*  
357 *Ageing and Development*, 94 (1997) 213–222
- 358 30. Hutt-Fletcher LM. Epstein–Barr virus entry. *Journal of Virology* 2007; 81: 7825–7832 [SEP]
- 359 31. Houldcroft CJ, Kellam P., Host genetics of Epstein–Barr virus infection, latency and disease,  
360 *Rev. Med. Virol*. 2015; 25: 71–84
- 361 32. Calcagno A, Atzori C, Romito A et al (2016) Blood brain barrier impairment is associated with  
362 cerebrospinal fluid markers of neuronal damage in HIV-positive patients. *J Neurovirol*  
363 22(1):88–92
- 364 33. Anesten B, Yilmaz A, Hagberg L, et al. : Blood-brain barrier integrity, intrathecal  
365 immunoactivation, and neuronal injury in HIV. *Neurol Neuroimmunol Neuroinflamm*.  
366 2016;3(6):e300
- 367 34. Carroll A, Brew B. HIV-associated neurocognitive disorders: recent advances in pathogenesis,  
368 biomarkers, and treatment. *F1000Res* 2017; 6:312
- 369 35. A. Menet, C. Speth, C. Larcher, W. M. Prodinger, M. G. Schwendinger, P. C. et al. (1999).  
370 Epstein-Barr Virus Infection of Human Astrocyte Cell Lines. *Journal of Virology*, 73(9), 7722–  
371 7733.
- 372 36. Daugvilaite, V., Arfelt, K. N., Benned-Jensen, T., Sailer, A. W., & Rosenkilde, M. M. (2014).  
373 Oxysterol-EBI2 signaling in immune regulation and viral infection. *European Journal of*  
374 *Immunology*, 44(7), 1904–1912. <https://doi.org/10.1002/eji.201444493>
- 375 37. Rutkowska, A., Preuss, I., Gessier, F., Sailer, A. W., & Dev, K. K. (2015). EBI2 regulates  
376 intracellular signaling and migration in human astrocyte. *Glia*, 63(2), 341–351.  
377 <https://doi.org/10.1002/glia.22757>

- 378 38. Dahl V, Low levels of HIV-1 RNA detected in the cerebrospinal fluid after up to 10 years of  
379 suppressive therapy are associated with local immune activation. *AIDS*. 2014;28:2251–2258
- 380 39. Chan P, Hellmuth J, Spudich S, Valcour V (2016) Cognitive impairment and persistent CNS  
381 injury in treated HIV. *Curr HIV/AIDS Rep* 13:209–217
- 382 40. Motta I., Allice T., Romito A., Calcagno A.:Cerebrospinal fluid viral load and neopterin in  
383 HIV-positive patients with undetectable viraemia., *Antivir Ther* 2017 Feb 15
- 384 41. Gianella S., Chaillon MA, Mutlu EA. : Effect of cytomegalovirus and Epstein–Barr virus  
385 replication on intestinal mucosal gene expression and microbiome composition of HIV-infected  
386 and uninfected individuals, *AIDS* 2017, 31:2059–2067
- 387 42. Tagawa T, et al. (2016) Epstein-Barr viral miRNAs inhibit antiviral CD4+ T-cell responses  
388 targeting IL-12 and peptide processing. *J Exp Med*, 10.1084/jem.2016024
- 389 43. Rensing, M.E., M. van Gent, A.M. Gram, M.J.G. Hooykaas, S.J. Piersma, and E.J.H.J. Wiertz.  
390 2015. Immune evasion by Epstein-Barr virus. *Curr. Top. Microbiol. Immunol.* 391:355–381. 
- 391
